# Supplementary material for: Deep-breathing Fe-doped superstructure modified by polyethyleneimine as oxygen reduction electrocatalysts for Zn–air batteries
Source: Royal Society of Chemistry journal article supplement (doi:10.1039/d2ce00470d), 2022-01-01
Supplement: d2ce00470d1.pdf [file d2ce00470d1.pdf]

# Deep-Breathing Fe-Doped Superstructure Modified by Polyethyleneimine as Oxygen Reduction Electrocatalysts for Zn-Air Batteries

Yang Li<sup>□</sup>, Jun Liu, Lingcheng Zheng, Yanyan Zhang, Wenhan Zhou, Kejian Shi, Haiyu Xu, Juan Gao

(School of Mechanics and Optoelectronic Physics, Anhui University of Science and Technology,  
Huainan 232001, P. R. China)

## *Characterization:*

The phase compositions of the samples were performed by Raman spectroscopy (inVia-Reflex, Renishaw, UK) and XRD (Bruker D8 Advance diffractometer) using Cu K $\alpha$  radiation ( $\lambda = 1.5406 \text{ \AA}$ ), which was scanned from  $10^\circ$  to  $80^\circ$  at  $0.02^\circ \text{ s}^{-1}$ . Field-emission scanning electron microscopy (FE-SEM, S-4800, Hitachi, Japan), transmission electron microscopy (TEM, JEM-2100, JEOL, Japan) were also performed. X-ray photoelectron spectroscopy (XPS) was conducted using a Mg K $\alpha$  achromatic X-ray source. The binding energies were calibrated using the C 1s peak of adventitious carbon at 284.8 eV as a reference.

## *Electrochemical Measurements:*

All the electrochemical measurements were conducted with electrochemical workstation (CHI 760E, Chenhua). Platinum wire serves as counter electrode. Glassy carbon rotating disk electrode (RDE) loaded with catalysts acts as working electrode. Ag/AgCl electrode is reference electrode. The catalyst ink was obtained by dispersing

0.005 g sample and 0.05 mL Nafion solution (5 wt%) in 1 mL mixed solution of purified water and isopropyl alcohol (3:1). Then, 0.008 mL catalyst ink was dropped onto the surface of the RDE for natural drying. Linear sweep voltammetry (LSV) curves from -0.8 to 0.2 V (vs. Ag/AgCl) under different rotating speed (400~2500 rpm) were conducted to investigate ORR activity. LSV curves from 0 to 1.0 V were used to research OER activity of samples in O<sub>2</sub>-saturated 0.1 M KOH solution. Both scanning speed is 5 mV s<sup>-1</sup>. Cyclic voltammetry (CV) was scanned from -0.9 to 0.1 V with 20 mV s<sup>-1</sup> sweep speed in oxygen/nitrogen saturated 0.1 M KOH solution. The electron transfer number (*n*) can be obtained according to K-L curve:

$$\frac{1}{j} = \frac{1}{j_k} + \frac{1}{B \times \omega^{1/2}}$$

$$B = 0.2 \times n \times F \times C_{O_2} \times D_{O_2}^{2/3} \times \nu^{-1/6}$$

Here, *n* represents electron transfer number, *F* represents Faraday constant (96,485 C mol<sup>-1</sup>), *C*<sub>O<sub>2</sub></sub> represents saturated concentration of O<sub>2</sub> in 0.1M KOH aqueous solution (1.2×10<sup>-6</sup> mol cm<sup>-3</sup>), *D*<sub>O<sub>2</sub></sub> represents diffusion coefficient of O<sub>2</sub> (1.9×10<sup>-5</sup> cm<sup>2</sup> s<sup>-1</sup>) in 0.1 M KOH aqueous solution, *ν* represents kinematic viscosity of the solution (0.01 cm<sup>2</sup> s<sup>-1</sup>), *ω* represents angular velocity of the disk, and *J<sub>k</sub>* represents kinetic current density. Rotating ring-disk electrode (RRDE) measures were conducted using the same catalyst inks. The RRDE curve was scanned with 5 mV s<sup>-1</sup>. The electron transfer numbers (*n*) and peroxide yield (HO<sub>2</sub><sup>-</sup> %) are calculated with the subsequent equations:

$$n = 4 \times \frac{I_d}{I_d + I_r/N}$$

$$HO_2^- \% = 200 \frac{I_r/N}{I_d + I_r/N}$$

Here, *I<sub>d</sub>* represents disk current, *I<sub>r</sub>* represents ring current, and *N* represents collection

efficiency of the Pt ring (0.37). The stability of the catalyst was examined through CV scanning of 10,000 cycles ( $300 \text{ mV s}^{-1}$ ).

#### *Fabrication and test of liquid rechargeable ZABs*

First, 0.01 g catalyst was suspended in 0.74 mL purified water, 0.2 mL isopropanol, and 60  $\mu\text{L}$  5 wt% Nafion solution to produce catalyst ink. Then, the air-cathode was fabricated via dropping 100  $\mu\text{L}$  catalyst ink onto  $1 \text{ cm}^{-2}$  hydrophobic carbon cloth. Thus, the catalyst loading is  $\sim 0.001 \text{ g cm}^{-2}$ . Combined with the Zn-foil anode and 6M KOH/0.2M Zn (Ac)<sub>2</sub> electrolyte, the liquid ZABs can be obtained. Battery tests were carried out on an electrochemical workstation at room temperature.

The specific capacity was calculated according to the equation:

$$\frac{\text{current} \times \text{service hours}}{\text{weight of consumed zinc}}$$

The energy density was calculated according to the equation:

$$\frac{\text{current} \times \text{service hours} \times \text{average discharge voltage}}{\text{weight of consumed zinc}}$$

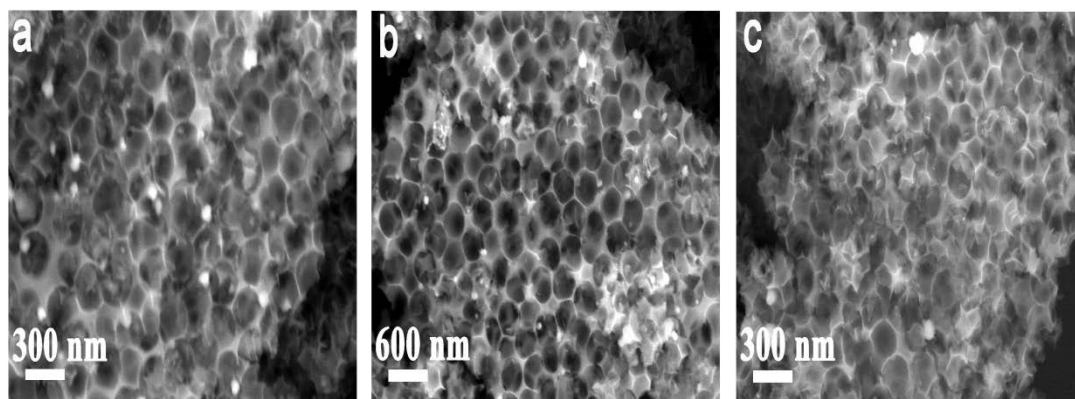

Figure S1. SEM images of the samples. a) cal-FeZIF-NSC-0, b) cal-FeZIF-NSC-0.5, c) cal-FeZIF-NSC-1.

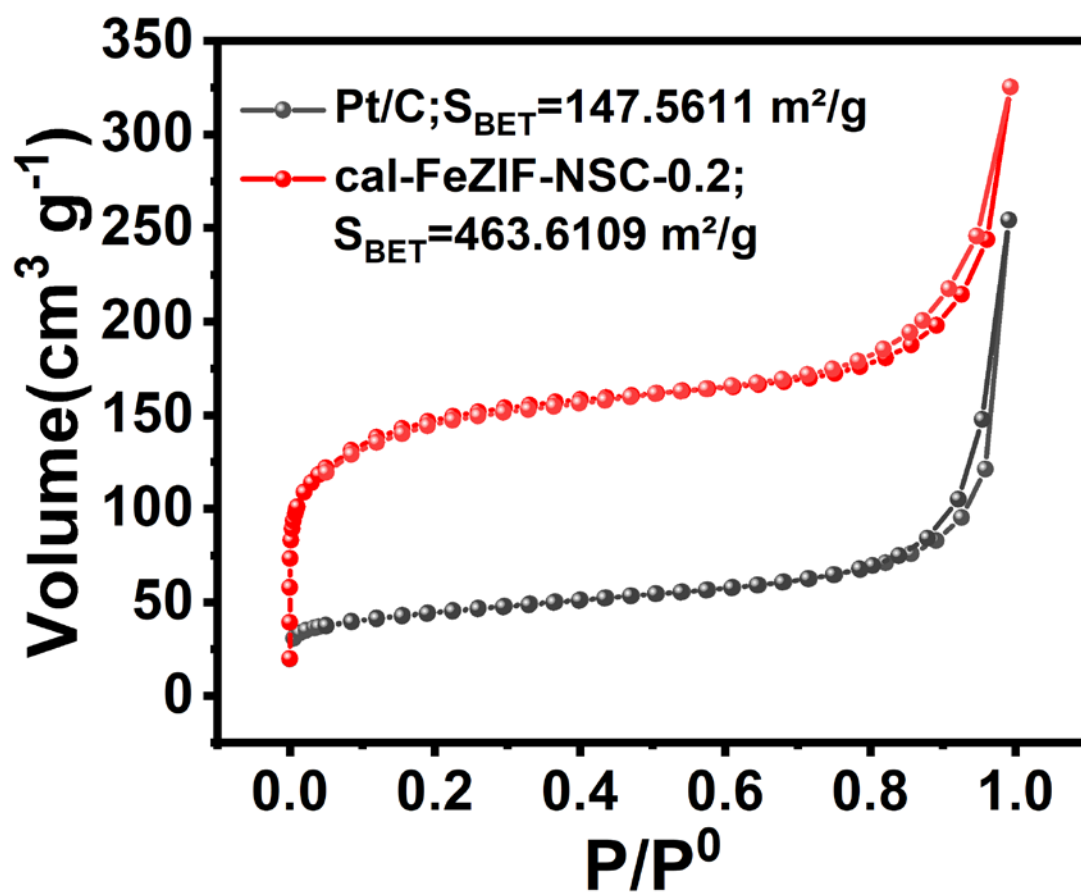

Figure S2. N<sub>2</sub> sorption isotherms of Pt/C and cal-FeZIF-NSC-0.2 samples.

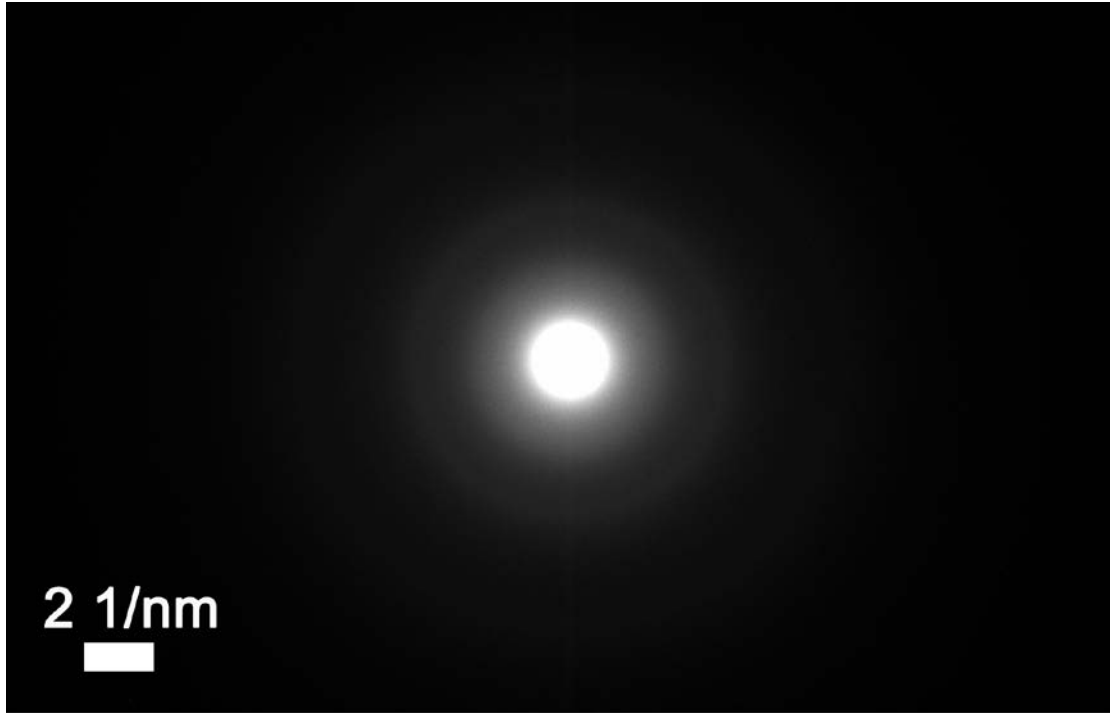

Figure S3. electron diffraction pattern image of the cal-FeZIF-NSC-0.2 composite.

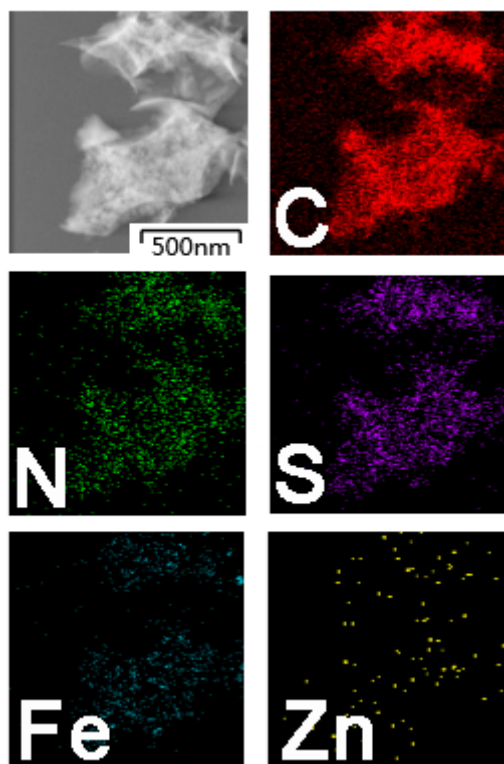

Figure S4. C, N, S, Fe and Zn elemental mapping the synthesized cal-FeZIF-NSC-0.2

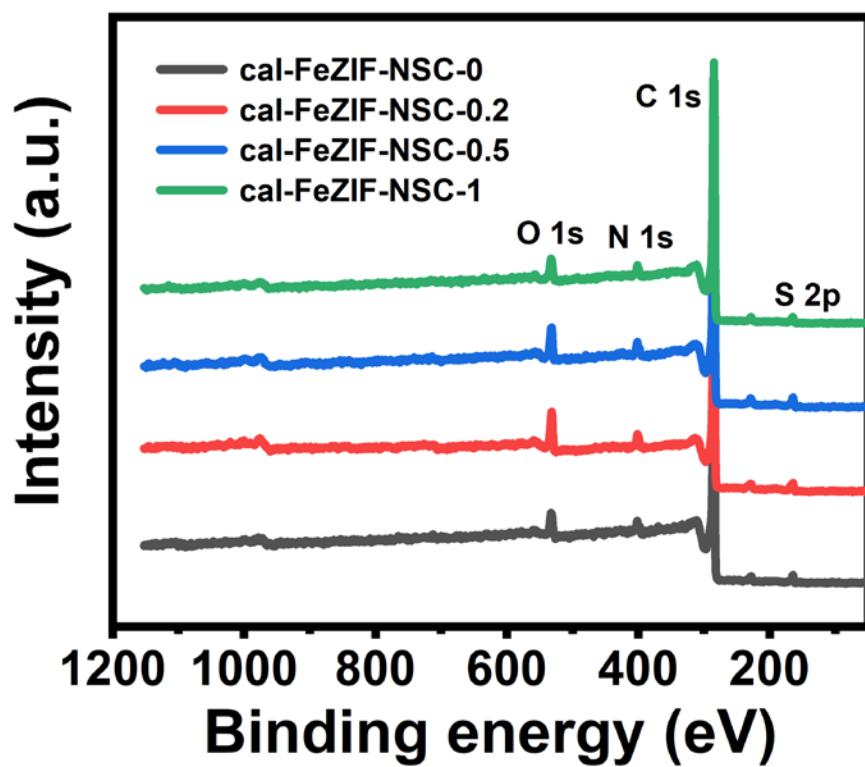

Figure S5. XPS survey spectrum of cal-FeZIF-NSC-0, cal-FeZIF-NSC-0.2, cal-FeZIF-NSC-0.5 and cal-FeZIF-NSC-1.



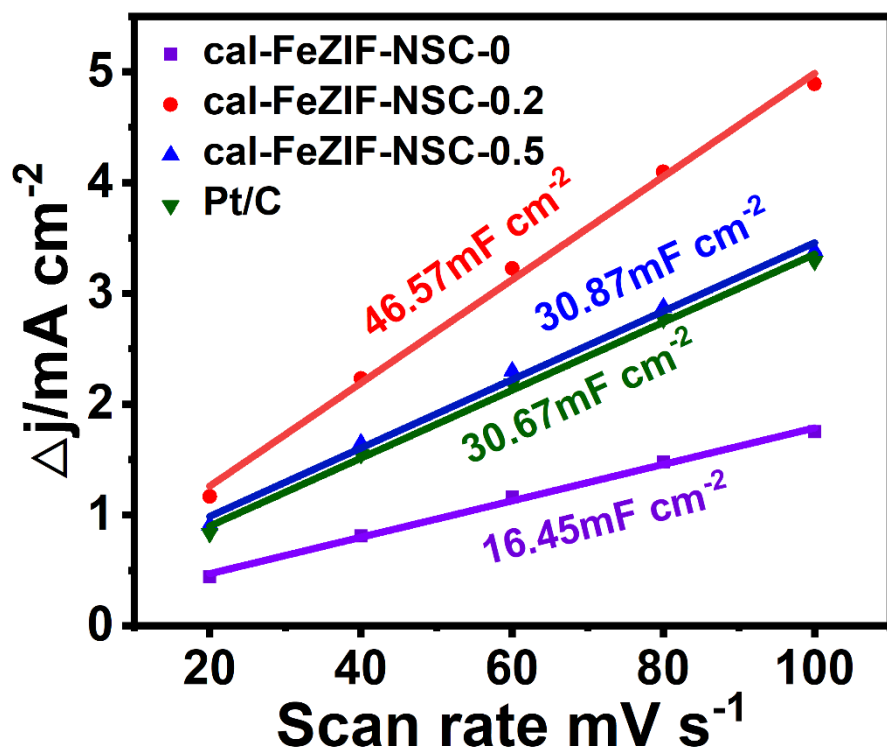

Figure S6. Linear fit of capacitive current to CV scan rate for synthesized cal-FeZIF-NSC-0, cal-FeZIF-NSC-0.2, cal-FeZIF-NSC-0.5 and Pt/C catalysts.

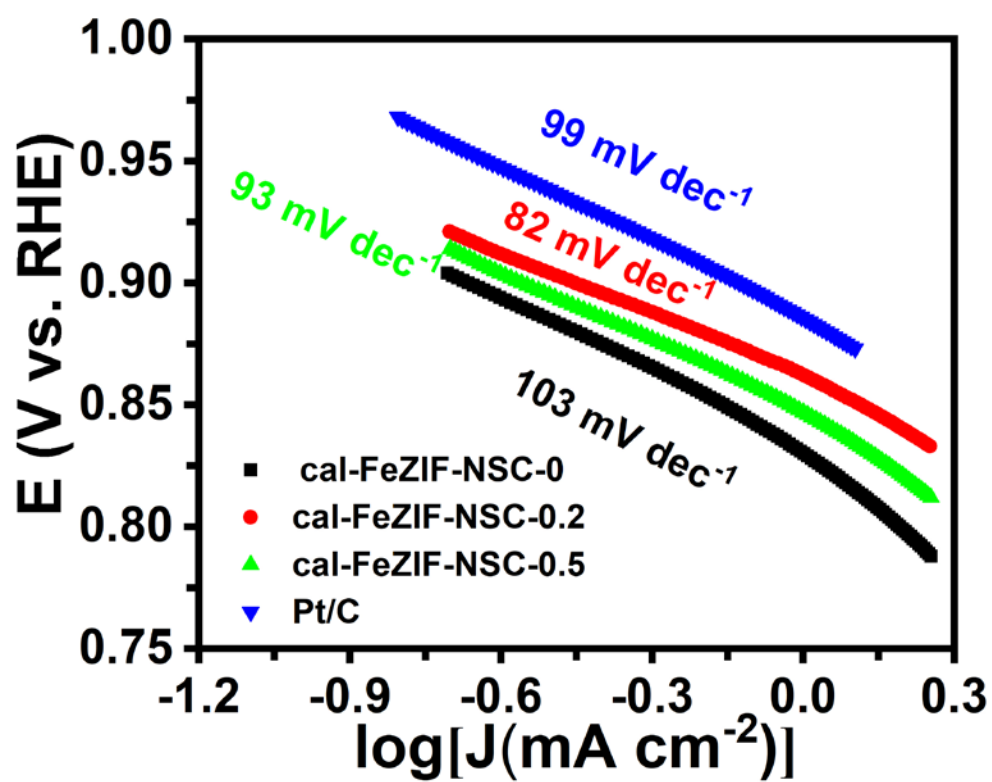

Figure S7. Tafel plot of cal-FeZIF-NSC-0, cal-FeZIF-NSC-0.2, cal-FeZIF-NSC-0.5 and Pt/C.

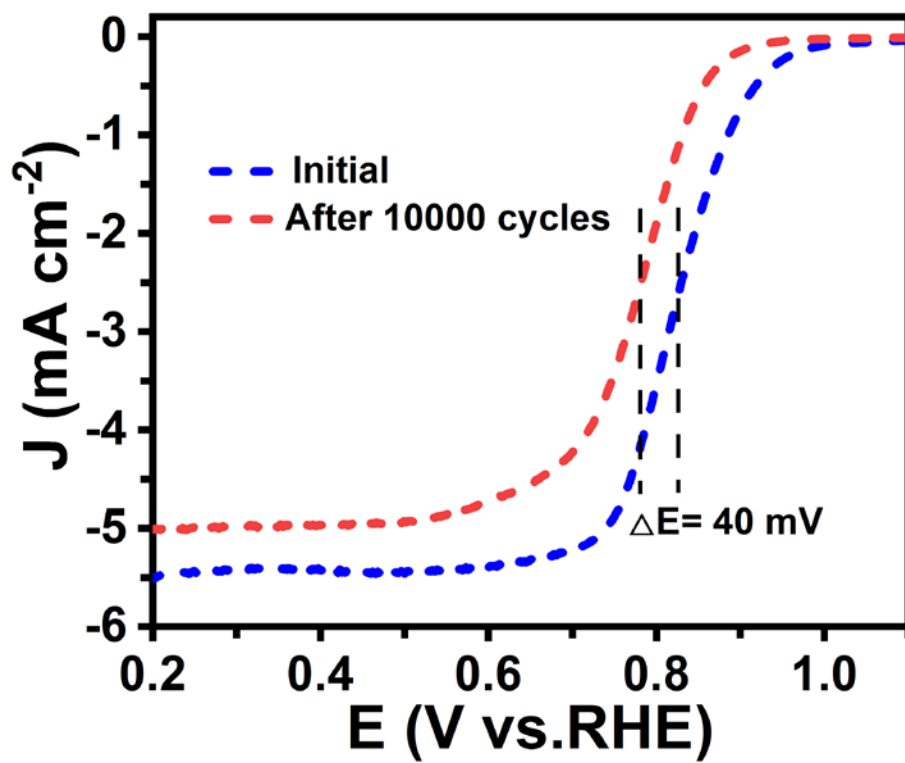

Figure S8. LSV curves before and after 10000 cycles of the commercial Pt/C catalyst.

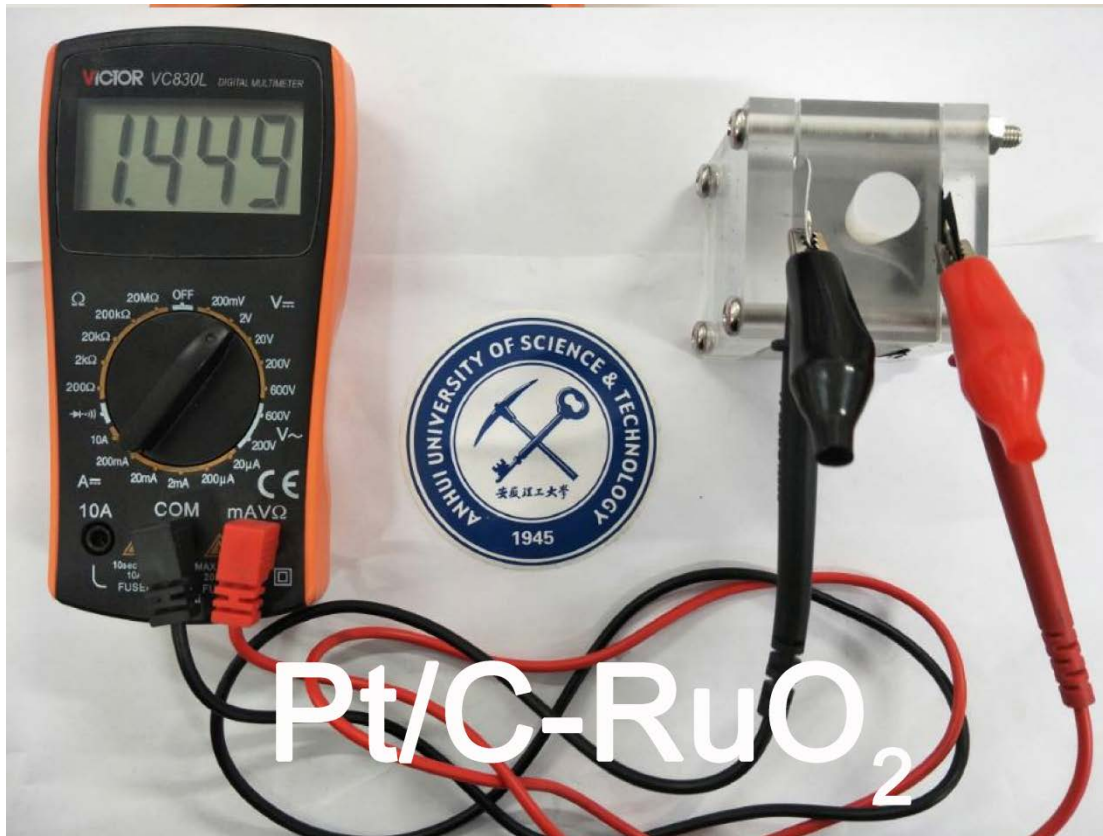

Figure S9. OCP of the ZAB based on Pt/C-RuO<sub>2</sub>.

Table 1 Comparisons of electrocatalytic performance (vs RHE) for cal-FeZIF-NSC with other reported bi-functional ORR/OER catalysts in 0.1 M KOH electrolyte.

| Catalyst                                                               | $E_{1/2}$ [V] | $E_{onset}$ [V] | Ref       |
|------------------------------------------------------------------------|---------------|-----------------|-----------|
| S and N co-doped carbon                                                | 0.78          | 0.96            | 1         |
| N-G                                                                    | 0.78          | 0.95            | 2         |
| Ni/NiO                                                                 | 0.76          | 0.87            | 3         |
| (Ni,Co)S <sub>2</sub>                                                  | 0.71          | 0.82            | 4         |
| CoNi/BCF                                                               | 0.80          | 0.91            | 5         |
| NiCo <sub>2</sub> S <sub>4</sub> @g-C <sub>3</sub> N <sub>4</sub> -CNT | 0.76          | 0.87            | 6         |
| Co/CoFe@NC                                                             | 0.84          | 0.97            | 7         |
| Co-N <sub>4</sub> /NC                                                  | 0.81          | 0.93            | 8         |
| Pt/C                                                                   | 0.82          | 0.99            | This work |
| cal-FeZIF-NSC                                                          | 0.80          | 0.97            | This work |

Table 2 Comparisons of electrocatalytic performance for Zn-air batteries with cal-FeZIF-NSC cathodes with other reported ones.

| Catalyst                | Peak power density<br>[mW cm <sup>-2</sup> ] | specific capacity<br>[mAh g <sub>zn</sub> <sup>-1</sup> ] | Stability                             | Ref       |
|-------------------------|----------------------------------------------|-----------------------------------------------------------|---------------------------------------|-----------|
| S and N co-doped carbon | 94.8                                         | --                                                        | 60 min/cycle for<br>500 cycles(500 h) | 1         |
| CoNi/BCF                | 155.1                                        | 710.9                                                     | 20 min/cycle for<br>180 cycles(60h)   | 5         |
| Co/CoFe@NC              | 146.6                                        | 775.2                                                     | 40 min/cycle for<br>550 cycles(360h)  | 7         |
| Co-N4/NC                | 101.62                                       | 762.8                                                     | 10 min/cycle for<br>100 cycles(17h)   | 8         |
| N-GRW                   | 65                                           | 873                                                       | 10 min/cycle for<br>150 cycles(30 h)  | 9         |
| Zn/Co-ZIFs/PAN          | 83.5                                         | 640.3                                                     | 10 min/cycle for<br>108 cycles(18h)   | 10        |
| NPHG                    | 30                                           | --                                                        | 60 min/cycle for<br>176 cycles(176h)  | 11        |
| NPMC foam               | 55                                           | --                                                        | 60 min/cycle for<br>600 cycles(100h)  | 12        |
| NiO/CoN PINWs           | 70                                           | 690                                                       | 10 min/cycle for<br>50 cycles(8h)     | 13        |
| Pt/C-RuO <sub>2</sub>   | 70                                           | 673                                                       | 20 min/cycle for<br>165 cycles(55h)   | This work |
| cal-FeZIF-NSC           | 85                                           | 744                                                       | 20 min/cycle for<br>165 cycles(55h)   | This work |

## References

- [1] Y. Guo, S. Yao, L. Gao, A. Chen, M. Jiao, H. Cui and Z. Zhou, *J. Mater. Chem. A*, 2020, **8**, 4386-4395.
- [2] H. Zhang, T. Wang, A. Sumboja, W. Zang, J. Xie, D. Gao, S. J. Pennycook, Z. Liu, C. Guan and J. Wang, *Adv. Funct. Mater.*, 2018, **28**, 1804846.
- [3] P. Liu, J. Ran, B. Xia, S. Xi, D. Gao and J. Wang, *Nano-micro lett.*, 2020, **12**, 1-12.
- [4] J. Zhang, X. Bai, T. Wang, W. Xiao, P. Xi, J. Wang, D. Gao and J. Wang, *Nano-micro lett.*, 2019, **11**, 1-13.
- [5] W. Wan, X. Liu, H. Li, X. Peng, D. Xi and J. Luo, *Appl. Catal., B*, 2019, **240**, 193-200.
- [6] X. Han, W. Zhang, X. Ma, C. Zhong, N. Zhao, W. Hu and Y. Deng, *Adv. Mater.*, 2019, **31**, 1808281.
- [7] Y. Niu, X. Teng, S. Gong, M. Xu, S.-G. Sun and Z. Chen, *Nano-micro lett.*, 2021, **13**, 1-16.
- [8] K. Chen, S. Kim, M. Je, H. Choi, Z. Shi, N. Vladimirov, K. H. Kim and O. L. Li, *Nano-micro lett.*, 2021, **13**, 1-20.
- [9] H. B. Yang, J. Miao, S.-F. Hung, J. Chen, H. B. Tao, X. Wang, L. Zhang, R. Chen, J. Gao and H. M. Chen, *Sci. adv.*, 2016, **2**, e1501122.
- [10] Q. Niu, B. Chen, J. Guo, J. Nie, X. Guo and G. Ma, *Nano-micro lett.*, 2019, **11**, 1-17.
- [11] L. Zhou, C. Zhang, X. Cai, Y. Qian, H. Jiang, B. Li, L. Lai, Z. Shen and W. Huang, *ChemElectroChem*, 2018, **5**, 1811-1816.
- [12] J. Zhang, Z. Zhao, Z. Xia and L. Dai, *Nat. Nanotechnol.*, 2015, **10**, 444-452.
- [13] J. Yin, Y. Li, F. Lv, Q. Fan, Y.-Q. Zhao, Q. Zhang, W. Wang, F. Cheng, P. Xi and S. Guo, *ACS Nano*, 2017, **11**, 2275-2283.
